# Supplementary material for: E-Cigarette Use Among US Adults in the 2021 Behavioral Risk Factor Surveillance System Survey
Source: PubMed Central journal article supplement (PMC10625038; doi:10.1001/jamanetworkopen.2023.40859), 2023-11-03

## Supplementary Online Content

Erhabor J, Boakye E, Obisesan O, et al. E-cigarette use among US adults in the 2021 Behavioral Risk Factor Surveillance System survey. *JAMA Netw Open*. 2023;6(11):e2340859. doi:10.1001/jamanetworkopen.2023.40859

**eTable 1.** Weighted Sample Size by Participant Characteristics

**eTable 2.** Weighted Prevalence of Current Sole E-Cigarette, Dual (E-Cigarette and Combustible Cigarette), and Exclusive Combustible Cigarette Use Across Age Groups, 2021 Behavioral Risk Factor Surveillance System

**eTable 3.** Age-Standardized Weighted Prevalence of E-Cigarette Use (Current and Daily) Across US States, 2019 Behavioral Risk Factor Surveillance System

**eFigure 1.** Proportion of Current E-Cigarette Use Among Individuals With No Smoking History

**eFigure 2.** Patterns of E-Cigarette and Combustible Cigarette Use by Age, 2021 Behavioral Risk Factor Surveillance System

**eFigure 3.** Prevalence of Current E-Cigarette Use by State, 2021 Behavioral Risk Factor Surveillance System

This supplementary material has been provided by the authors to give readers additional information about their work.

**eTable 1.** Weighted Sample Size by Participant Characteristics

| Variables                                    | Weighted Sample Size    |                       |
|----------------------------------------------|-------------------------|-----------------------|
|                                              | Current E-cigarette Use | Daily E-cigarette Use |
| <b>Total Population</b>                      | 15,000,000              | 6,997,185             |
| <b>Age</b>                                   |                         |                       |
| 18-20                                        | 2,272,805               | 973,314               |
| 21-24                                        | 2,856,732               | 1,383,501             |
| 25-29                                        | 2,363,261               | 1,090,105             |
| 30-34                                        | 2,018,333               | 935,607               |
| 35-39                                        | 1,248,489               | 572,981               |
| 40-44                                        | 1,169,616               | 589,471               |
| 45-49                                        | 659,915                 | 307,519               |
| 50-54                                        | 679,555                 | 336,142               |
| 55-59                                        | 566,114                 | 277,105               |
| ≥60                                          | 1,046,866               | 468,455               |
| <b>Sex</b>                                   |                         |                       |
| Male                                         | 8,551,857               | 4,011,064             |
| Female                                       | 6,453,806               | 2,986,121             |
| <b>Race/Ethnicity</b>                        |                         |                       |
| Non-Hispanic White                           | 9,751,578               | 5,080,748             |
| Non-Hispanic Black                           | 1,344,852               | 461,156               |
| Non-Hispanic Asian                           | 728,114                 | 220,823               |
| Hispanic                                     | 2,231,529               | 806,769               |
| NH or PI                                     | 60,566                  | 30,449                |
| AI or AN                                     | 171,728                 | 57,754                |
| Multiracial                                  | 354,166                 | 161,164               |
| Other                                        | 79,849                  | 33,817                |
| <b>Sexual orientation</b>                    |                         |                       |
| Heterosexual                                 | 6,622,109               | 3,055,647             |
| Lesbian/gay                                  | 311,718                 | 173,790               |
| Bisexual                                     | 853,060                 | 443,441               |
| Other                                        | 261,943                 | 140,239               |
| <b>Transgender</b>                           |                         |                       |
| No                                           | 7,953,105               | 3,746,689             |
| Yes                                          | 136,590                 | 83,977                |
| <b>BMI</b>                                   |                         |                       |
| <18.5kg/m <sup>2</sup>                       | 536,141                 | 303,213               |
| ≥18.5kg/m <sup>2</sup> to <25/m <sup>2</sup> | 5,252,346               | 2,329,854             |
| ≥25/m <sup>2</sup> to <30kg/m <sup>2</sup>   | 4,351,041               | 1,994,434             |
| ≥30 kg/m <sup>2</sup>                        | 4,182,311               | 2,036,613             |
| <b>Marital status</b>                        |                         |                       |
| Married                                      | 4,054,310               | 2,066,762             |
| Divorced or separated                        | 1,845,157               | 841,519               |
| Widowed                                      | 359,701                 | 181,468               |
| Single                                       | 7,074,178               | 3,023,460             |
| <b>Highest education level</b>               |                         |                       |
| Less than high school                        | 1,747,529               | 755,388               |
| ≥High school or some college                 | 10,900,000              | 5,248,705             |
| College graduate                             | 2,356,639               | 981,171               |

| Variables                        | Weighted Sample Size    |                       |
|----------------------------------|-------------------------|-----------------------|
|                                  | Current E-cigarette Use | Daily E-cigarette Use |
| <b>Income, poverty line, %</b>   |                         |                       |
| <100                             | 1,909,505               | 668,975               |
| 100-200                          | 3,245,710               | 1,523,573             |
| >200                             | 9,740,794               | 4,746,371             |
| <b>Employment status</b>         |                         |                       |
| Employed                         | 9,823,671               | 4,855,126             |
| Unemployed                       | 2,963,902               | 1,293,731             |
| Student                          | 1,390,582               | 467,529               |
| Retired                          | 691,679                 | 323,741               |
| <b>Area of residence</b>         |                         |                       |
| Rural                            | 945,570                 | 461,091               |
| Urban                            | 6,511,678               | 6,511,678             |
| <b>Combustible Cigarette Use</b> |                         |                       |
| Never                            | 4,882,539               | 1,720,260             |
| Former                           | 5,366,385               | 3,530,018             |
| Current                          | 4,632,683               | 1,690,674             |
| <b>Pregnant</b>                  |                         |                       |
| No                               | 5,078,994               | 2,315,756             |
| Yes                              | 100,215                 | 67,272                |
| <b>CVD<sup>a</sup></b>           |                         |                       |
| No                               | 14,100,000              | 6,593,551             |
| Yes                              | 741,132                 | 358,259               |
| <b>Cancer</b>                    |                         |                       |
| No                               | 14,400,000              | 6,703,288             |
| Yes                              | 542,463                 | 268,035               |
| <b>COPD</b>                      |                         |                       |
| No                               | 13,900,000              | 6,508,483             |
| Yes                              | 1,037,259               | 268,035               |
| <b>Asthma</b>                    |                         |                       |
| No                               | 11,800,000              | 5,473,904             |
| Yes                              | 3,128,123               | 1,473,624             |
| <b>Depression</b>                |                         |                       |
| No                               | 9,287,392               | 4,141,897             |
| Yes                              | 5,589,944               | 2,800,191             |

**eTable 2.** Weighted Prevalence of Current Sole E-Cigarette, Dual (E-Cigarette and Combustible Cigarette), and Exclusive Combustible Cigarette Use Across Age Groups, 2021 Behavioral Risk Factor Surveillance System

| Age Groups, years                                                                                                                                                                                     | Weighted Prevalence, % (95% CI) |                                     |                                                |
|-------------------------------------------------------------------------------------------------------------------------------------------------------------------------------------------------------|---------------------------------|-------------------------------------|------------------------------------------------|
|                                                                                                                                                                                                       | Exclusive E-cigarette Use       | Exclusive Combustible Cigarette Use | Dual E-cigarette and Combustible Cigarette Use |
| <b>Total Population</b>                                                                                                                                                                               | 4.7 (4.6-4.9)                   | 11.7 (11.4-11.9)                    | 2.2 (2.1-2.3)                                  |
| <b>18-20</b>                                                                                                                                                                                          | 15.2 (13.9-16.7)                | 1.3 (1.0-1.8)                       | 2.8 (2.3-3.3)                                  |
| <b>21-24</b>                                                                                                                                                                                          | 14.6 (13.6-15.6)                | 4.7 (4.1-5.4)                       | 3.9 (3.4-4.4)                                  |
| <b>25-29</b>                                                                                                                                                                                          | 9.2 (8.5-10.0)                  | 9.3 (8.6-10.0)                      | 4.0 (3.5-4.6)                                  |
| <b>30-34</b>                                                                                                                                                                                          | 5.9 (5.1-6.4)                   | 13.6 (12.8-14.5)                    | 3.2 (2.9-3.6)                                  |
| <b>35-39</b>                                                                                                                                                                                          | 4.1 (3.7-4.6)                   | 14.8 (14.0-15.6)                    | 2.9 (2.6-3.3)                                  |
| <b>40-44</b>                                                                                                                                                                                          | 3.6 (3.1-4.0)                   | 15.4 (14.6-16.2)                    | 2.5 (2.1-2.9)                                  |
| <b>45-49</b>                                                                                                                                                                                          | 2.4 (2.1-2.7)                   | 14.3 (13.4-15.3)                    | 2.1 (1.7-2.5)                                  |
| <b>50-54</b>                                                                                                                                                                                          | 2.0 (1.7-2.4)                   | 14.5 (13.7-15.3)                    | 1.6 (1.4-1.9)                                  |
| <b>55-59</b>                                                                                                                                                                                          | 1.8 (1.6-2.1)                   | 15.5 (14.7-16.3)                    | 1.4 (1.2-1.6)                                  |
| <b>≥60</b>                                                                                                                                                                                            | 0.9 (0.8-1.0)                   | 10.5 (10.1-10.8)                    | 0.6 (0.5-0.7)                                  |
| Note: Patterns are based on reported current use of e-cigarette and combustible cigarette use. Thus, sole e-cigarette use as defined may include individuals who formerly used combustible cigarettes |                                 |                                     |                                                |

**eTable 3.** Age-Standardized Weighted Prevalence of E-Cigarette Use (Current and Daily) Across US States, 2019 Behavioral Risk Factor Surveillance System

| States               | Weighted Prevalence, % (95% CI) |                       |
|----------------------|---------------------------------|-----------------------|
|                      | Current E-cigarette Use         | Daily E-cigarette Use |
| Alabama              | 9.1 (8.0-10.5)                  | 4.4 (3.6-5.5)         |
| Alaska               | 6.2 (5.2-7.3)                   | 3.0 (2.3-3.8)         |
| Arizona              | 8.8 (7.9-9.7)                   | 4.3 (3.8-5.0)         |
| Arkansas             | 7.3 (6.1-8.7)                   | 4.2 (3.3-5.2)         |
| California           | 5.2 (4.5-5.9)                   | 2.2 (1.8-2.7)         |
| Colorado             | 6.9 (6.3-7.5)                   | 3.7 (3.2-4.2)         |
| Connecticut          | 5.0 (4.3-5.8)                   | 2.3 (1.8-2.9)         |
| Delaware             | 6.1 (5.1-7.4)                   | 2.9 (2.2-3.8)         |
| District of Columbia | 4.8 (3.6-6.3)                   | 1.7 (1.0-3.0)         |
| Georgia              | 7.8 (6.8-9.0)                   | 3.6 (2.9-4.4)         |
| Guam                 | 11.1 (8.8-14.0)                 | 5.7 (4.2-7.7)         |
| Hawaii               | 7.3 (6.4-8.3)                   | 3.3 (2.7-4.0)         |
| Idaho                | 7.4 (6.5-8.3)                   | 4.2 (3.5-4.9)         |
| Illinois             | 6.4 (5.3-7.8)                   | 3.2 (2.4-4.2)         |
| Iowa                 | 6.4 (5.7-7.2)                   | 3.3 (2.8-3.9)         |
| Indiana              | 8.1 (7.3-8.9)                   | 4.0 (3.5-4.6)         |
| Kansas               | 6.6 (6.1-7.2)                   | 3.3 (3.0-3.7)         |
| Kentucky             | 9.3 (8.2-10.5)                  | 4.4 (3.6-5.3)         |
| Louisiana            | 9.0 (7.8-10.3)                  | 3.6 (2.9-4.5)         |
| Maine                | 5.8 (5.1-6.7)                   | 2.7 (2.2-3.4)         |
| Maryland             | 4.5 (3.9-5.0)                   | 1.8 (1.5-2.2)         |
| Massachusetts        | 4.7 (4.1-5.4)                   | 2.1 (1.7-2.6)         |
| Michigan             | 7.6 (6.8-8.4)                   | 3.3 (2.8-4.0)         |
| Minnesota            | 5.7 (5.2-6.2)                   | 2.6 (2.2-2.9)         |
| Mississippi          | 6.4 (5.4-7.6)                   | 2.9 (2.3-3.6)         |
| Missouri             | 7.4 (6.6-8.2)                   | 3.8 (3.3-4.4)         |
| Montana              | 6.1 (5.2-7.0)                   | 3.0 (2.4-3.8)         |
| Nebraska             | 6.7 (6.1-7.4)                   | 3.3 (2.9-3.9)         |
| Nevada               | 7.0 (5.7-8.6)                   | 2.6 (1.9-3.6)         |
| New Hampshire        | 4.9 (4.1-6.0)                   | 2.6 (2.0-3.5)         |
| New Jersey           | 6.0 (5.2-6.8)                   | 2.5 (2.0-3.0)         |
| New Mexico           | 7.3 (6.3-8.3)                   | 2.7 (2.1-3.4)         |
| New York             | 5.3 (4.9-5.8)                   | 2.4 (2.1-2.7)         |
| North Carolina       | 6.8 (5.9-7.9)                   | 3.3 (2.6-4.1)         |
| North Dakota         | 7.4 (6.4-8.5)                   | 3.7 (3.0-4.6)         |
| Ohio                 | 7.8 (7.1-8.6)                   | 4.0 (3.5-4.6)         |
| Oklahoma             | 9.4 (8.3-10.6)                  | 4.6 (3.8-5.5)         |
| Oregon               | 6.6 (5.8-7.5)                   | 3.0 (2.4-3.6)         |

| States         | Weighted Prevalence, % (95% CI) |                       |
|----------------|---------------------------------|-----------------------|
|                | Current E-cigarette Use         | Daily E-cigarette Use |
| Pennsylvania   | 6.1 (5.3-7.0)                   | 2.8 (2.3-3.5)         |
| Puerto Rico    | 2.0 (1.5-2.7)                   | 0.7 (0.4-1.1)         |
| Rhode Island   | 6.2 (5.1-7.4)                   | 2.8 (2.1-3.6)         |
| South Carolina | 7.2 (6.3-8.2)                   | 3.8 (3.2-4.5)         |
| South Dakota   | 6.1 (4.9-7.7)                   | 1.9 (1.4-2.7)         |
| Tennessee      | 9.1 (8.0-10.3)                  | 4.6 (3.8-5.6)         |
| Texas          | 6.0 (5.1-7.0)                   | 2.6 (2.1-3.3)         |
| Utah           | 7.2 (6.5-7.9)                   | 3.3 (2.8-3.8)         |
| Vermont        | 5.0 (4.1-6.1)                   | 2.6 (1.9-3.4)         |
| Virginia       | 6.8 (6.0-7.7)                   | 3.3 (2.8-4.0)         |
| Washington     | 6.5 (5.9-7.2)                   | 3.2 (2.8-3.7)         |
| West Virginia  | 7.1 (6.3-8.1)                   | 3.2 (2.6-3.9)         |
| Wisconsin      | 6.2 (5.3-7.3)                   | 3.0 (2.3-3.9)         |
| Wyoming        | 7.5 (6.2-9.0)                   | 4.1 (3.2-5.3)         |

**eFigure 1.** Proportion of Current E-Cigarette Use Among Individuals With No Smoking History

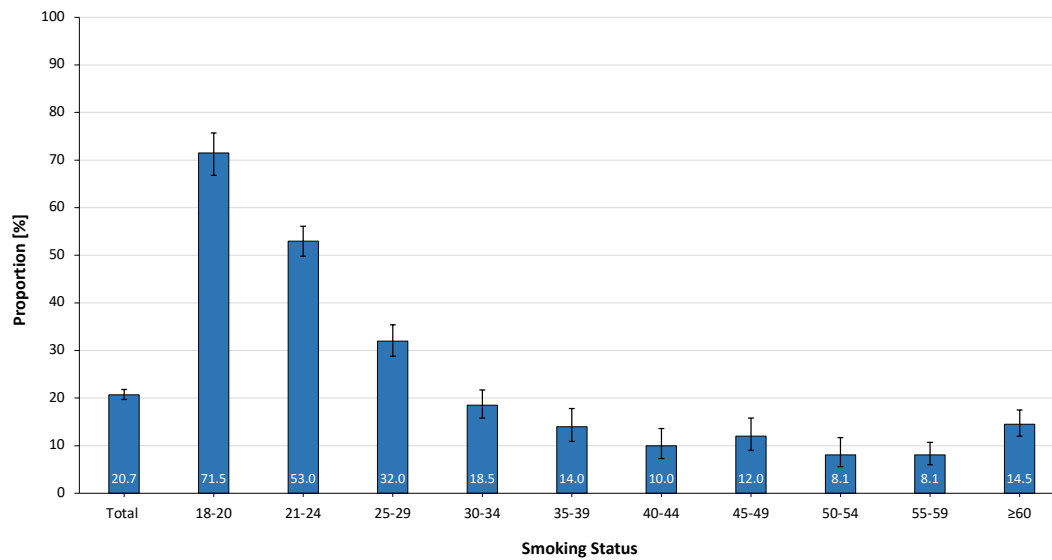

Error bars indicate 95% CIs

**eFigure 2.** Patterns of E-Cigarette and Combustible Cigarette Use by Age, 2021  
Behavioral Risk Factor Surveillance System

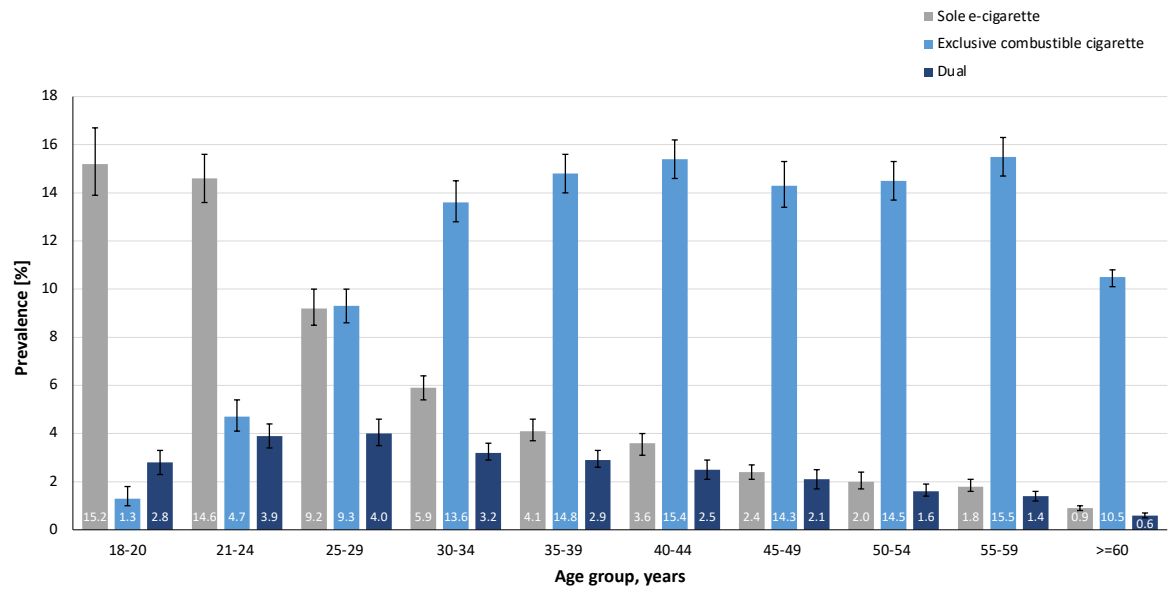

Error bars indicate 95% CIs. Sole e-cigarette use, as defined, may include individuals who formerly used combustible cigarettes, while dual use includes individuals who currently use both combustible cigarettes and e-cigarettes.



**eFigure 3.** Prevalence of Current E-Cigarette Use by State, 2021 Behavioral Risk Factor Surveillance System

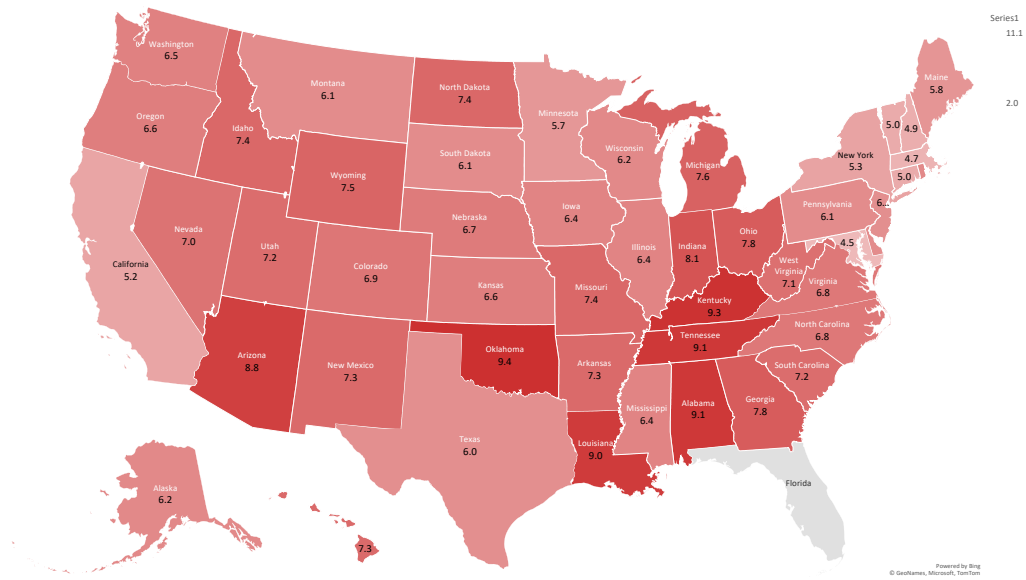

Supplement: jamanetwopen-e2340859-s001.pdf [file jamanetwopen-e2340859-s001.pdf]
