# Supplementary material for: E-Cigarette Use Among US Adults in the 2021 Behavioral Risk Factor Surveillance System Survey
Source: PubMed Central journal article supplement (PMC10625038; doi:10.1001/jamanetworkopen.2023.40859), 2023-11-03
Supplement: jamanetwopen-e2340859-s002.pdf [file jamanetwopen-e2340859-s002.pdf]

## Data Sharing Statement

Erhabor. E-Cigarette Use Among US Adults in the 2021 Behavioral Risk Factor Surveillance System Survey. *JAMA Netw Open*. Published November 03, 2023.

doi:10.1001/jamanetworkopen.2023.40859

### Data

**Data available:** No

### Additional Information

**Explanation for why data not available:** The BRFSS data are publicly available.
